# Supplementary material
Source: PubMed Central journal article supplement (PMC8419680)

Fig 2A

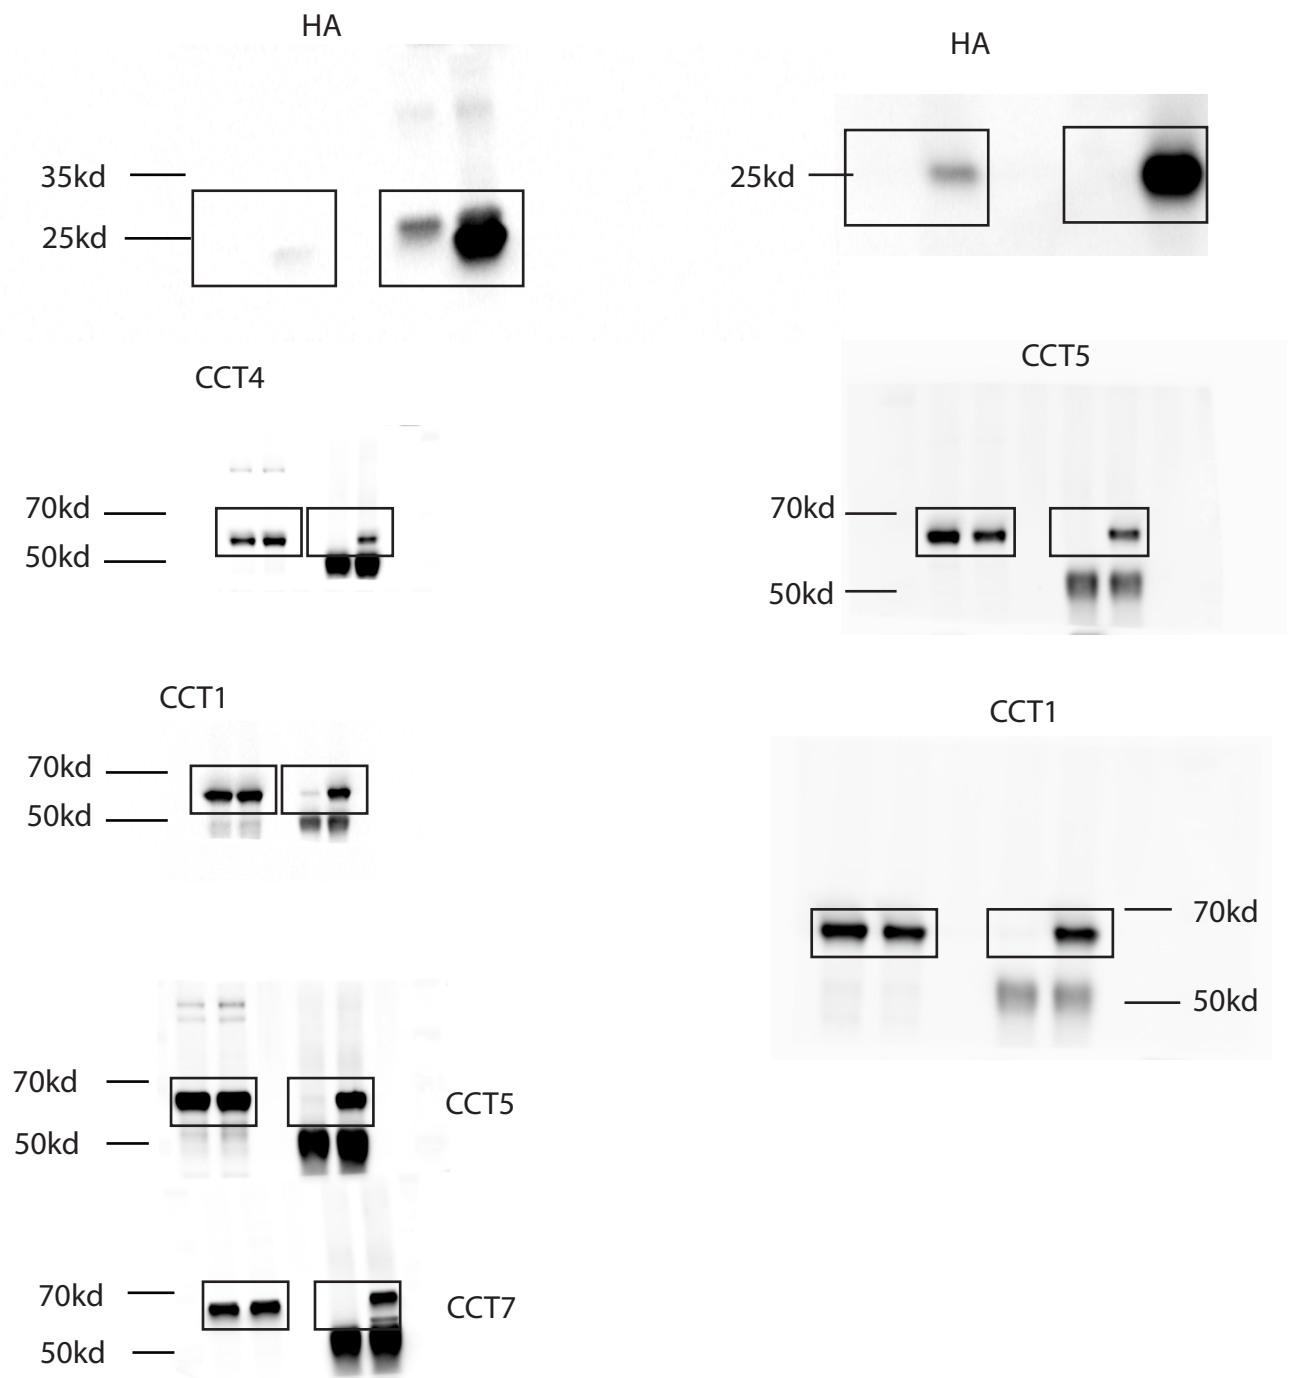

Fig 2B

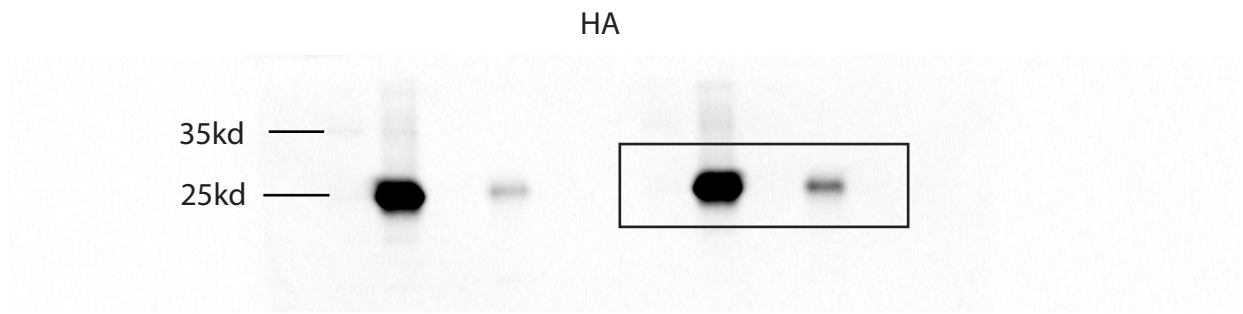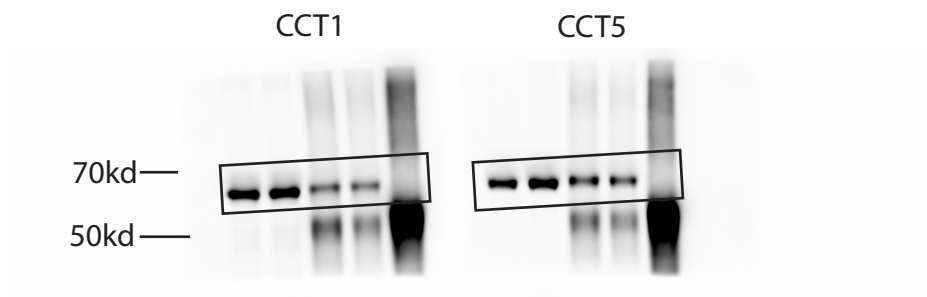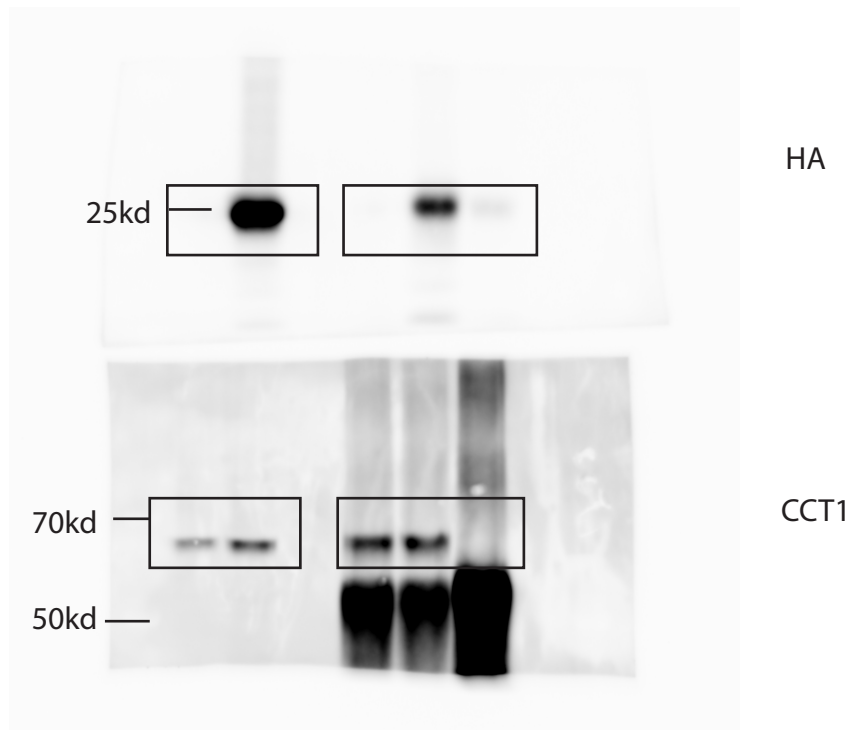

Fig 2C

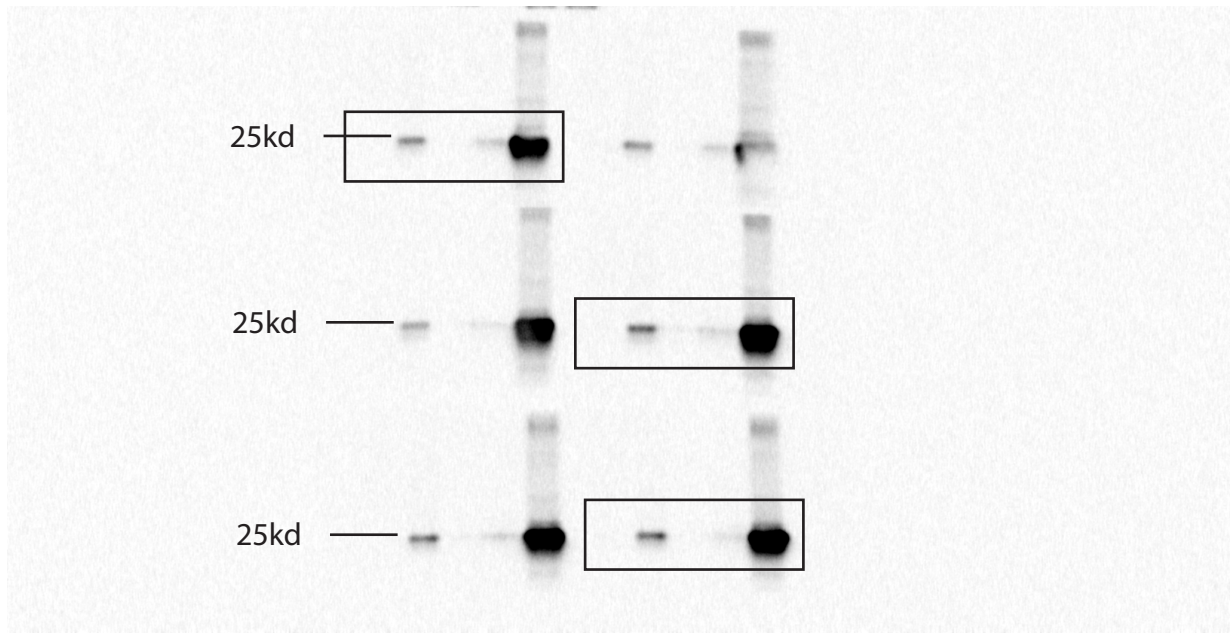

HA

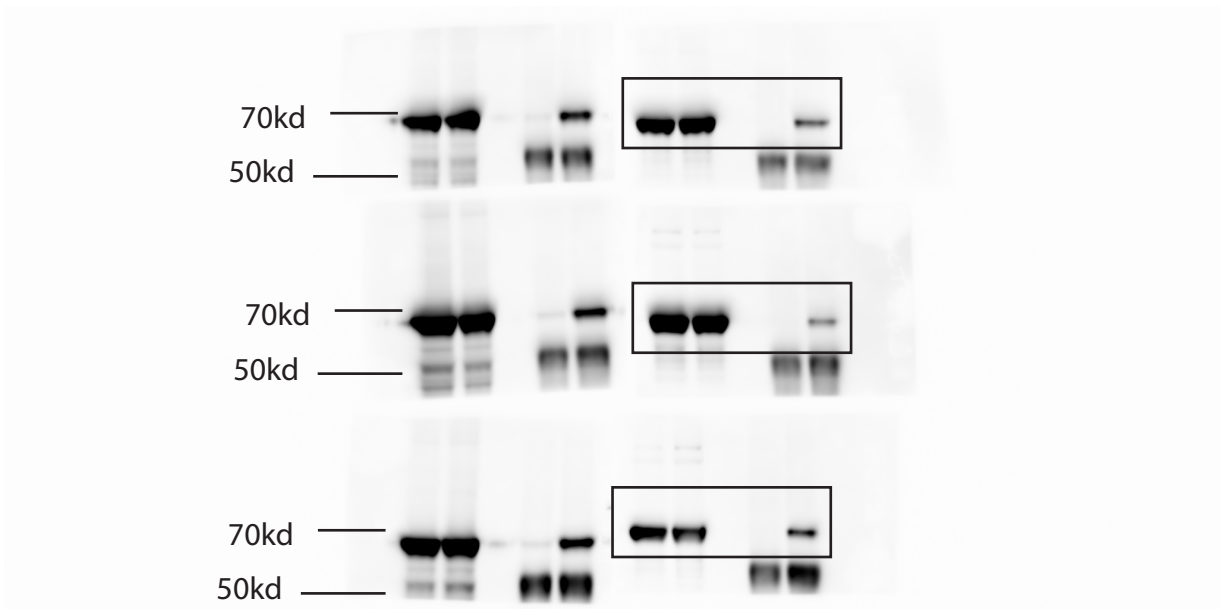

CCT5

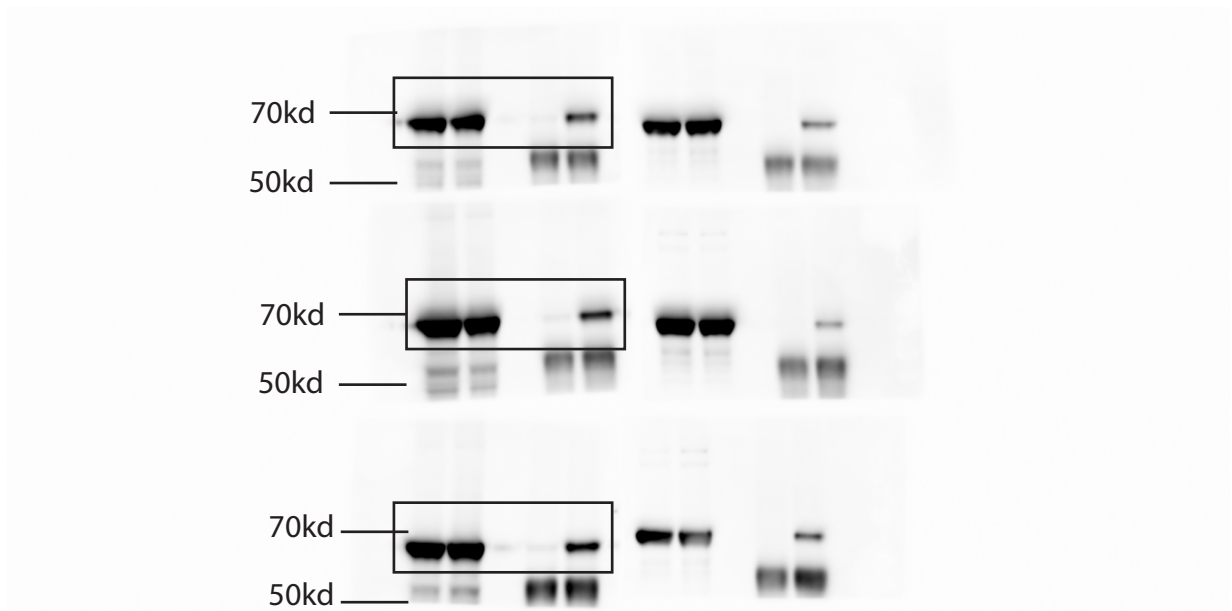

CCT1

Fig 2D

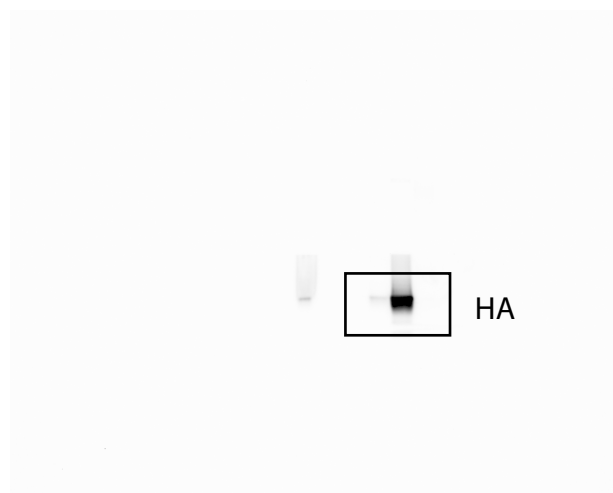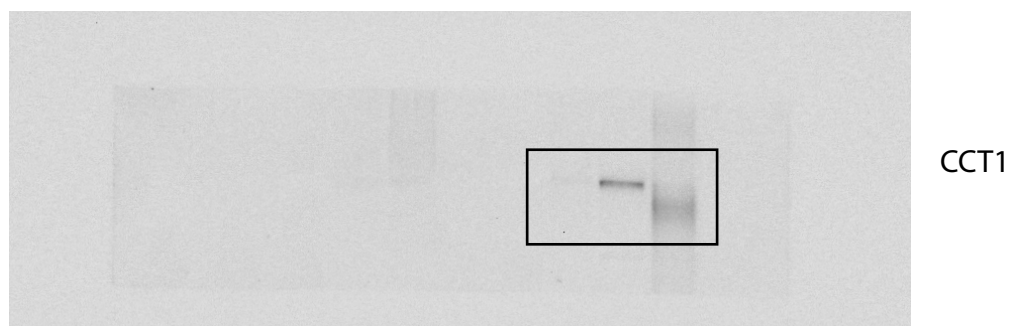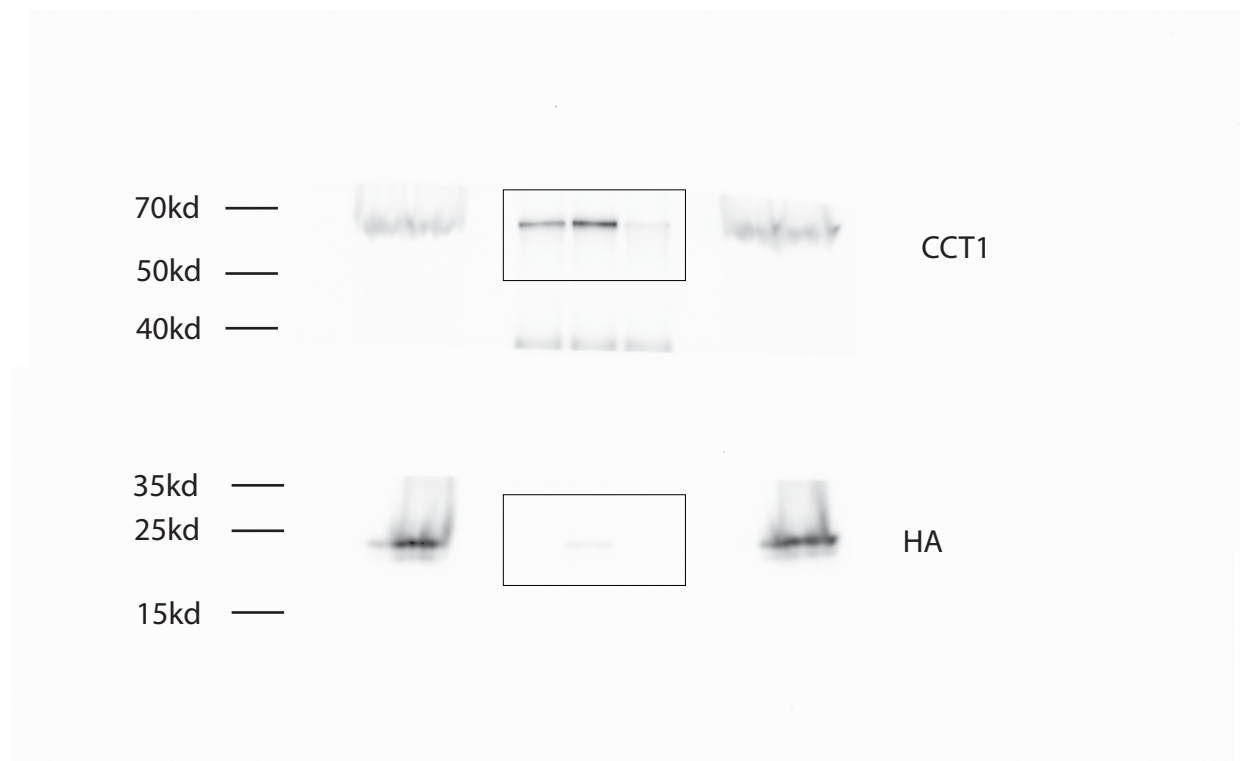

Supplement: EMBR-22-e52145-s002.pdf [file EMBR-22-e52145-s002.pdf]

Fig EV1A

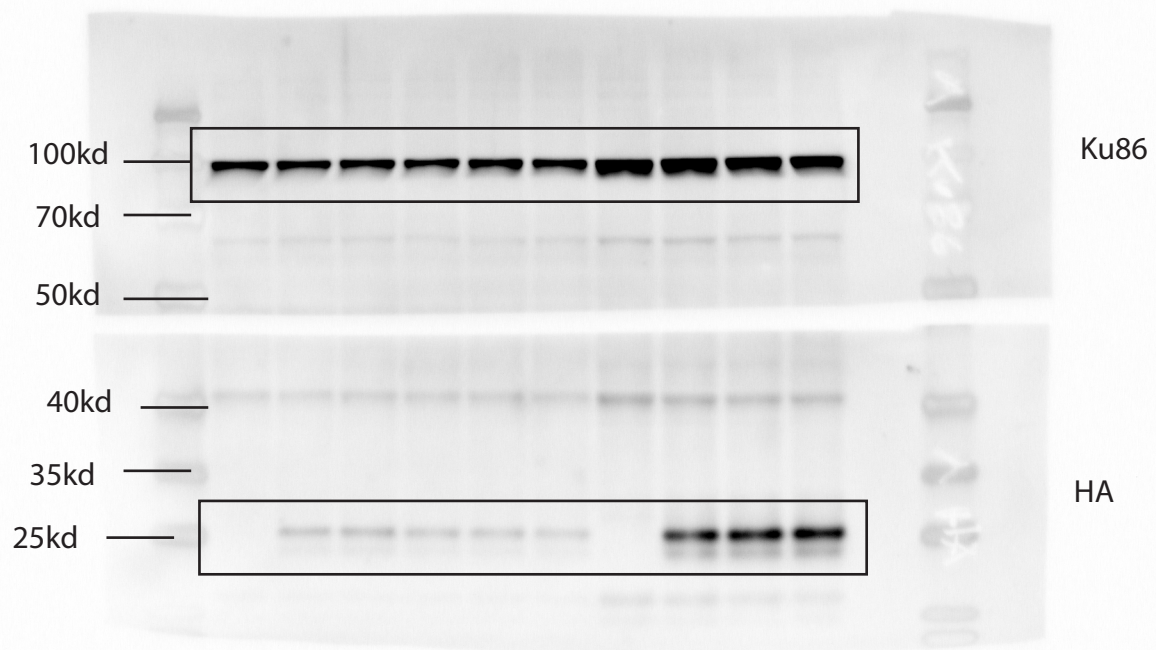

Supplement: EMBR-22-e52145-s003.pdf [file EMBR-22-e52145-s003.pdf]

Fig 4A

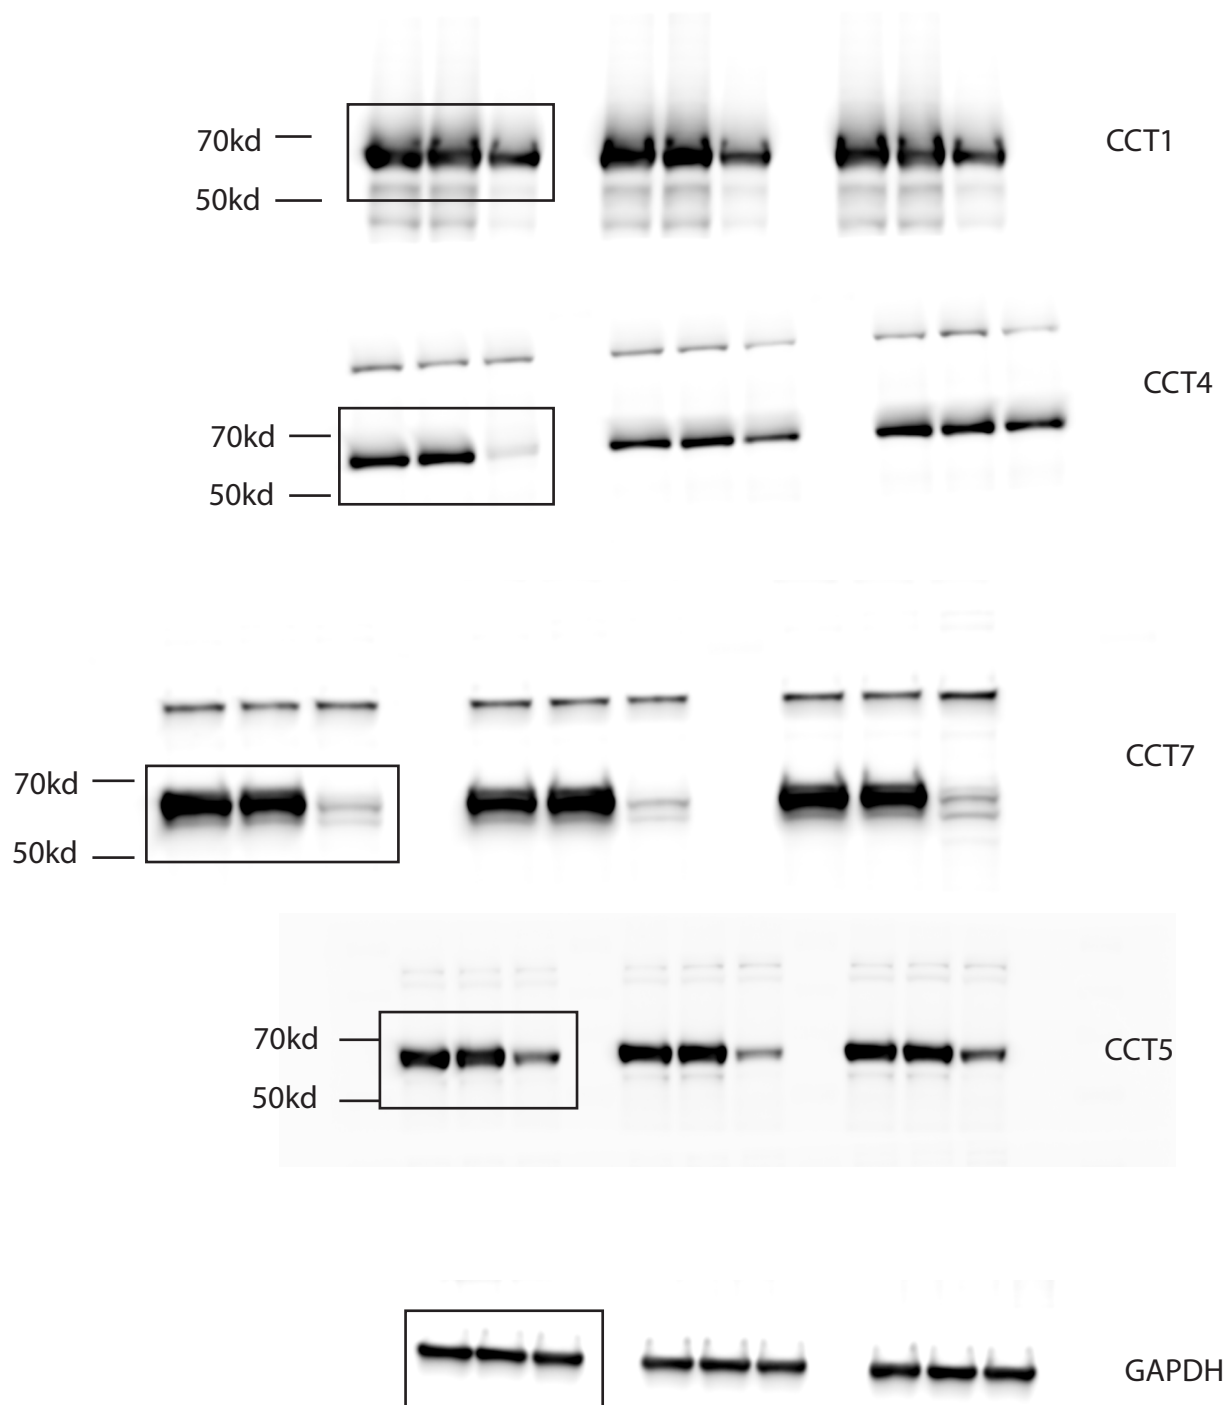

Fig 4B (left)

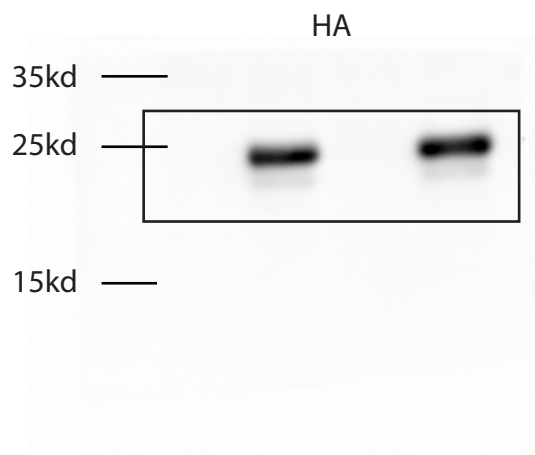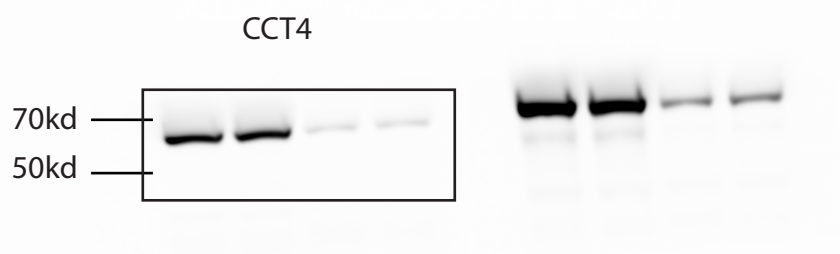

Ku86

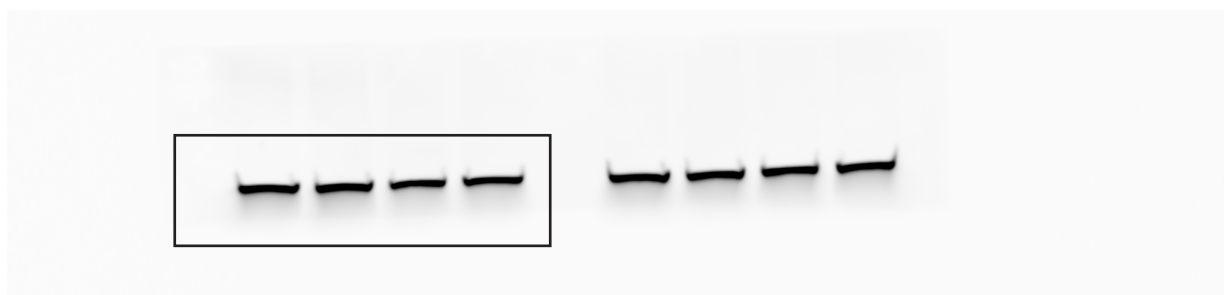

Fig 4B (right)

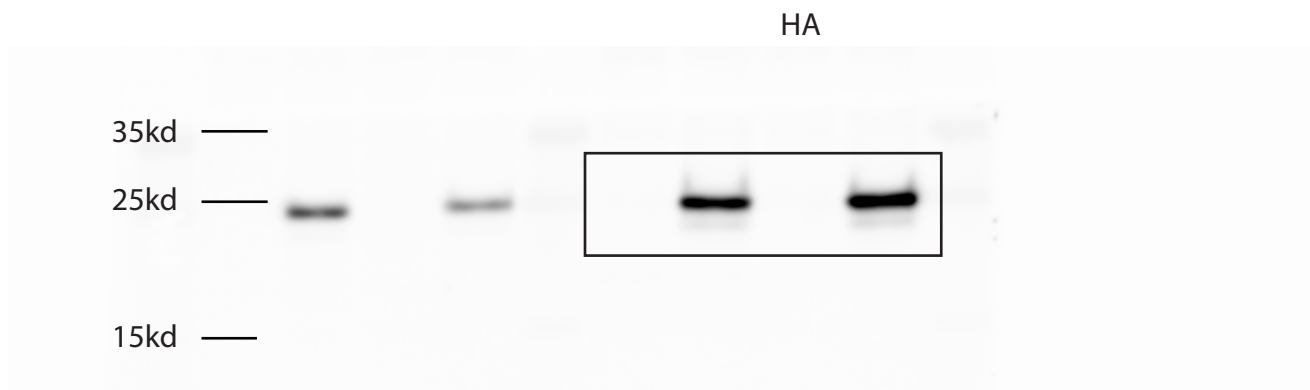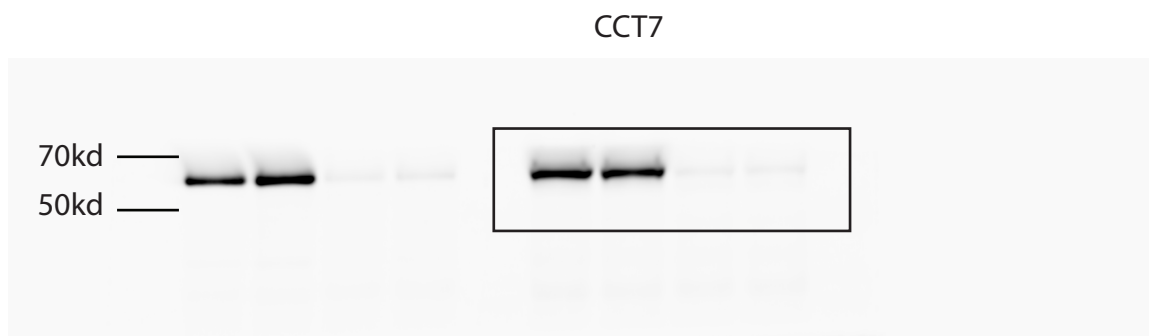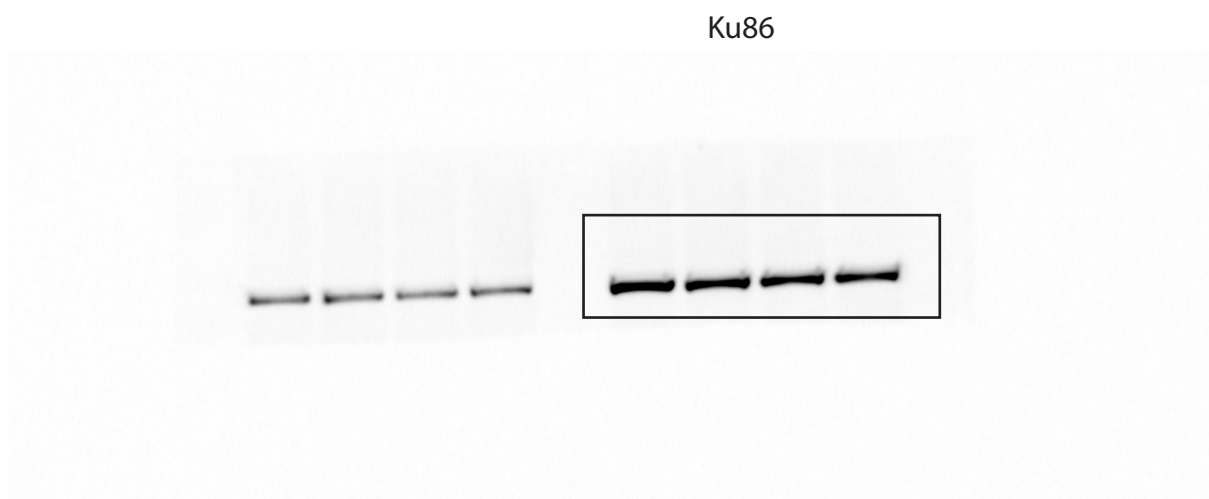

Fig 4D

HA

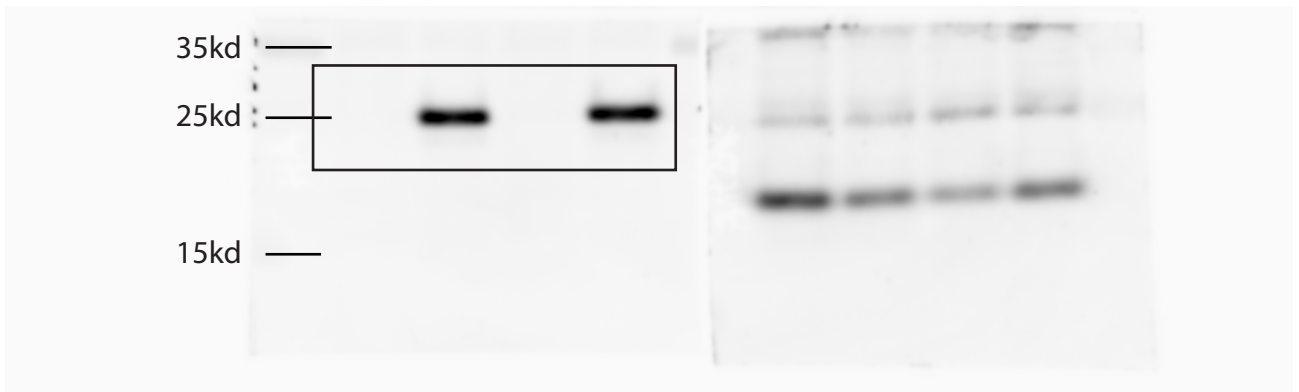

CCT4

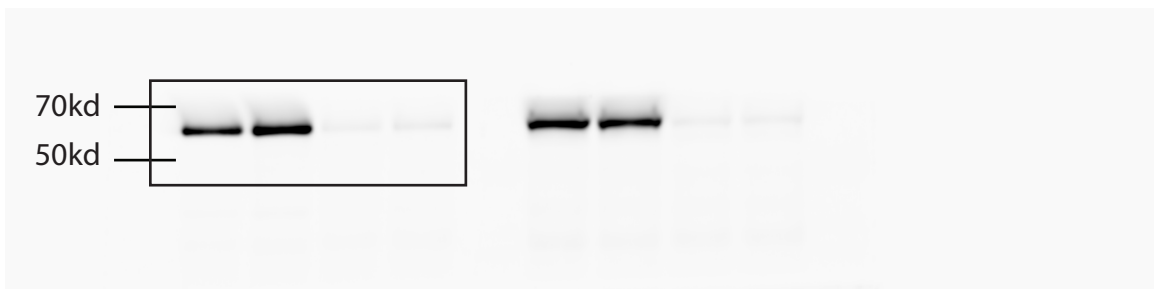

Ku86

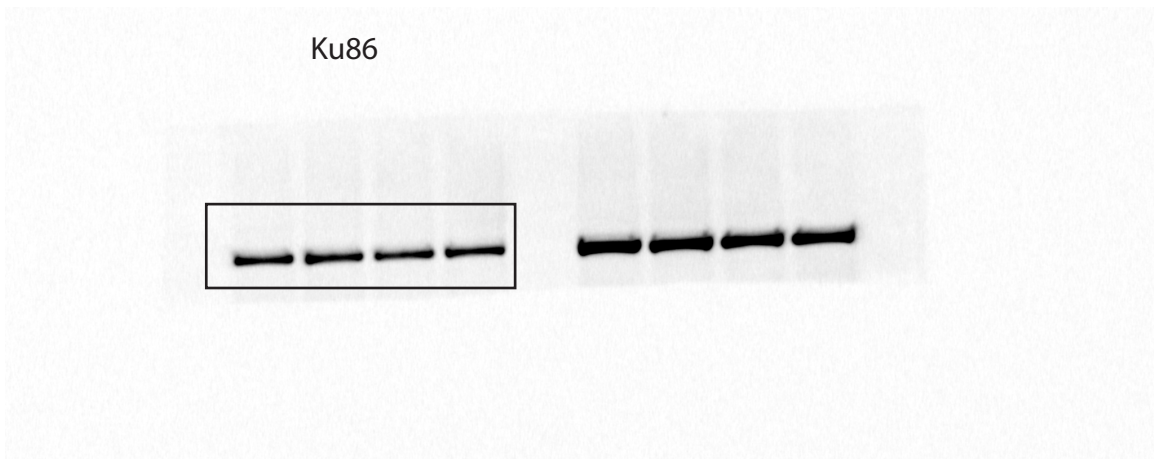

Fig 4E

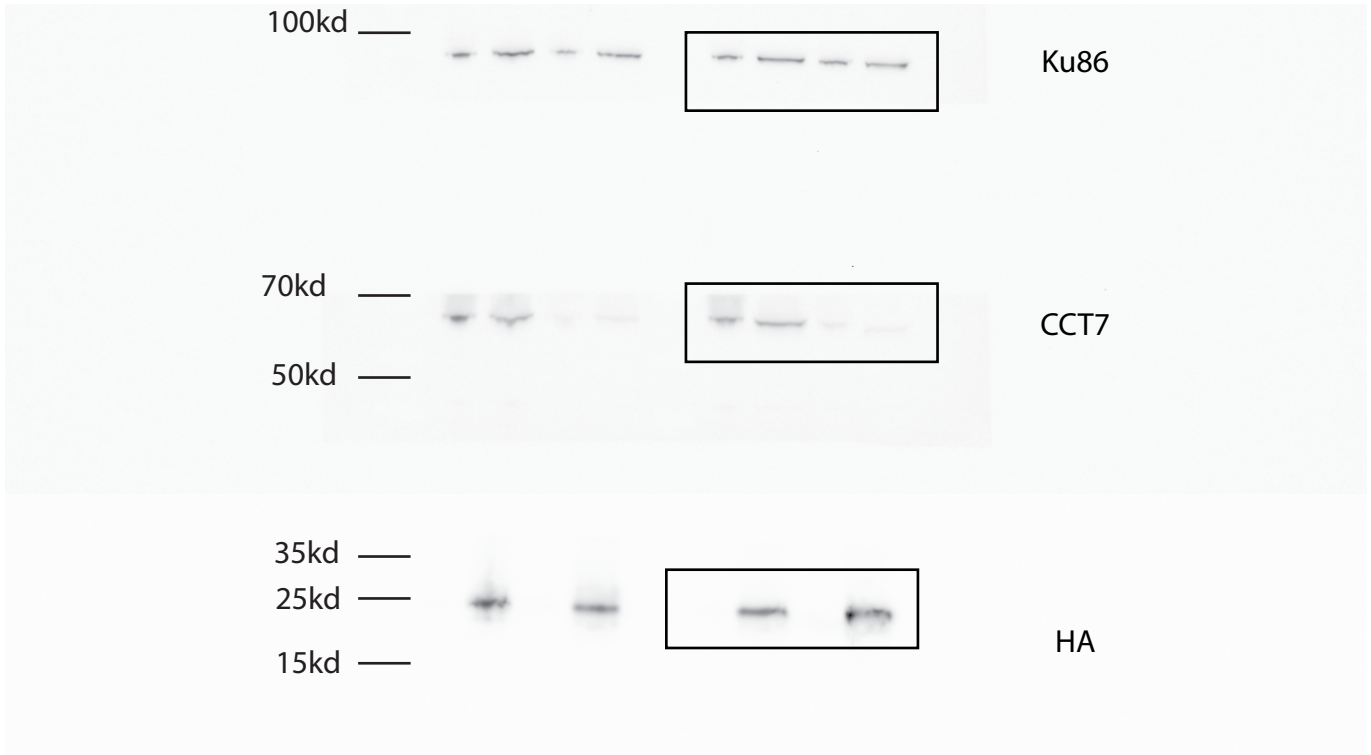

Supplement: EMBR-22-e52145-s005.pdf [file EMBR-22-e52145-s005.pdf]

**Fig 3A**

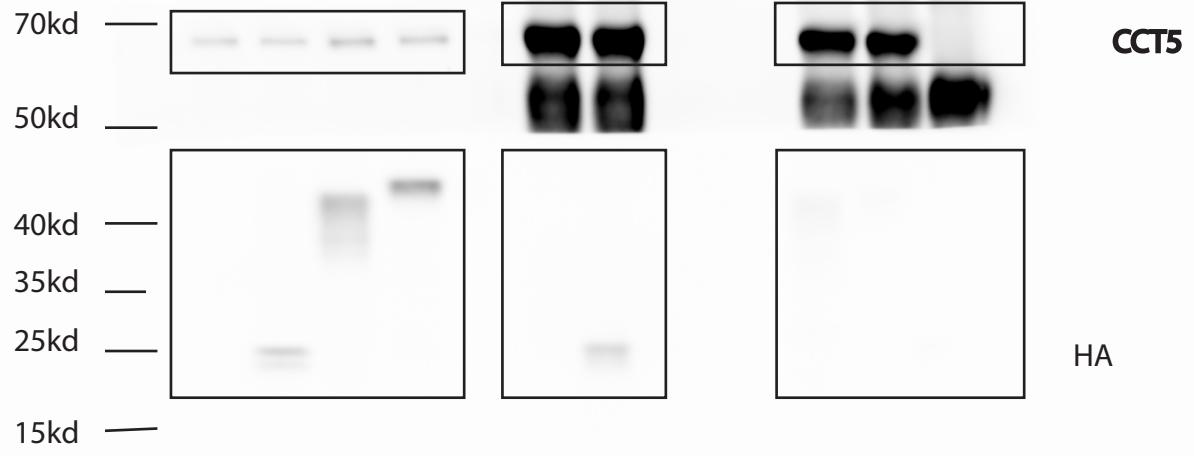

Fig 3B

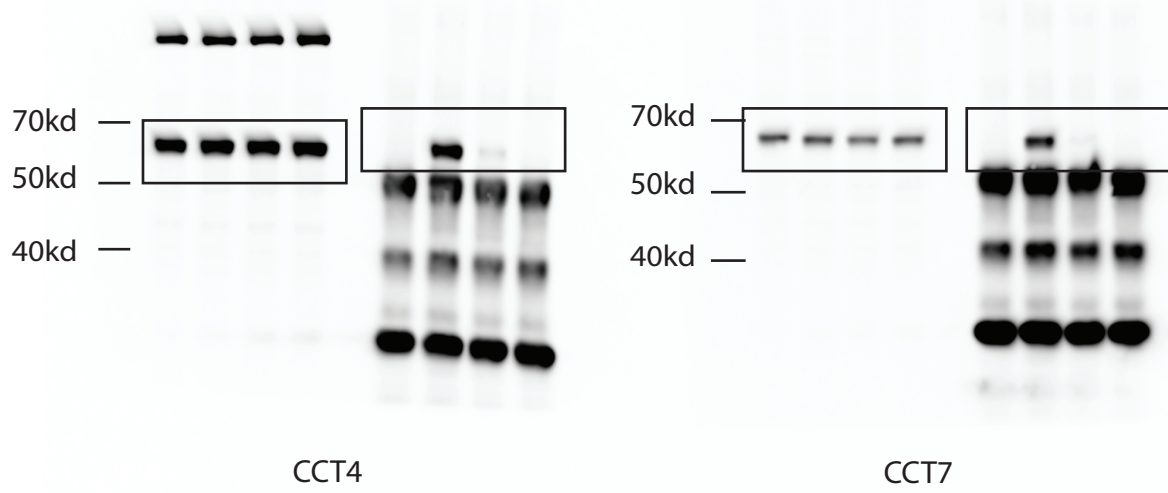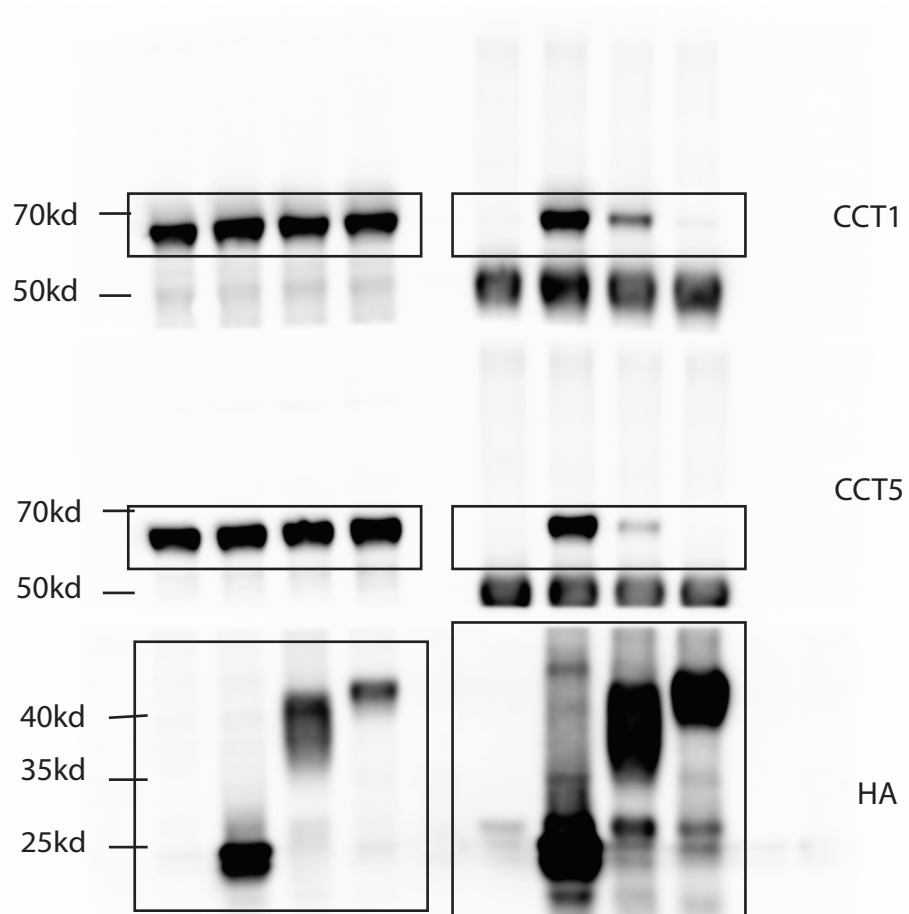

Fig 3C

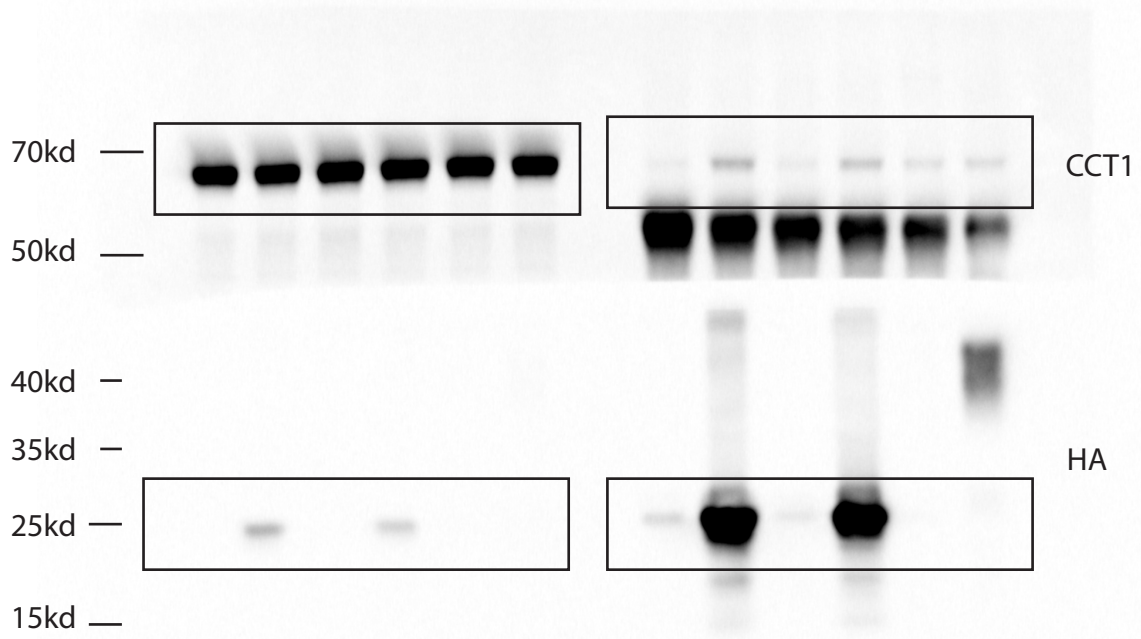

Fig 3D

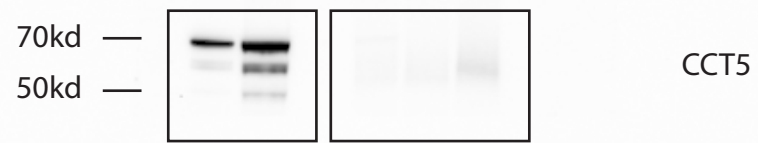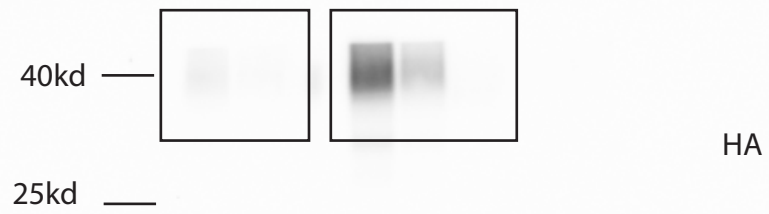



Fig 3E

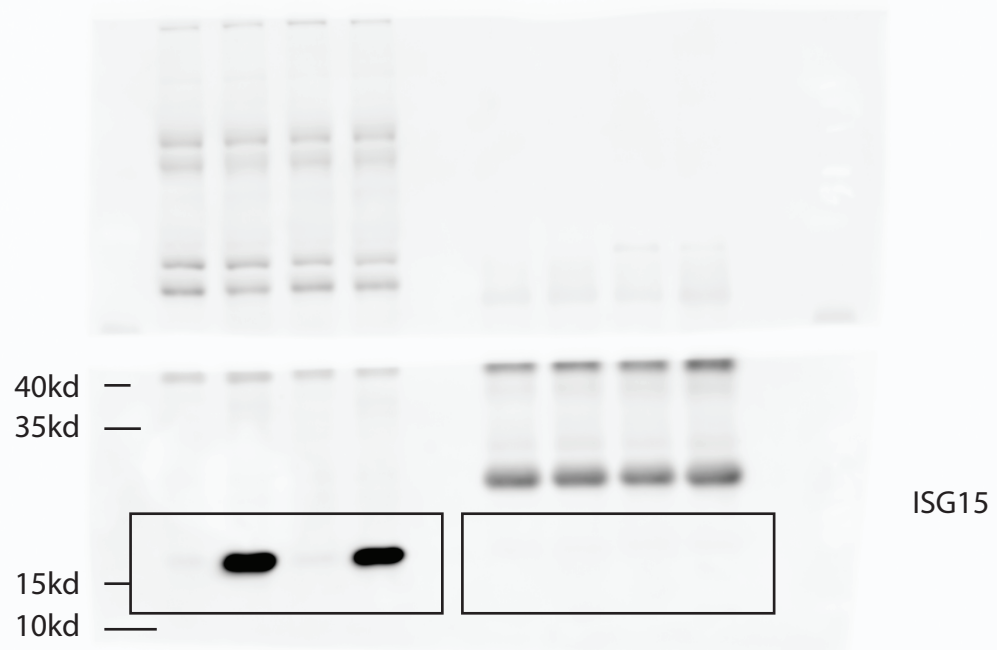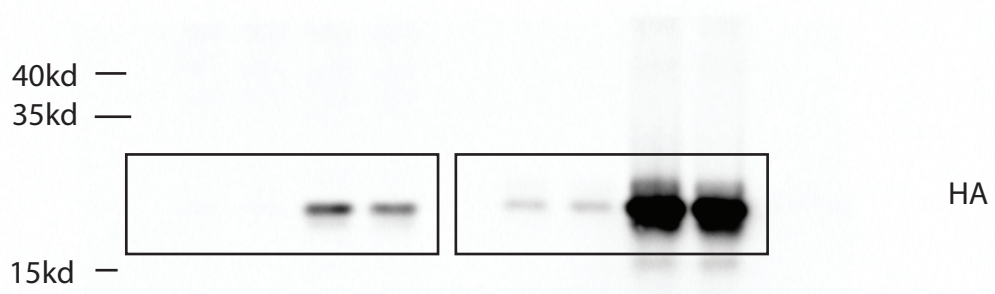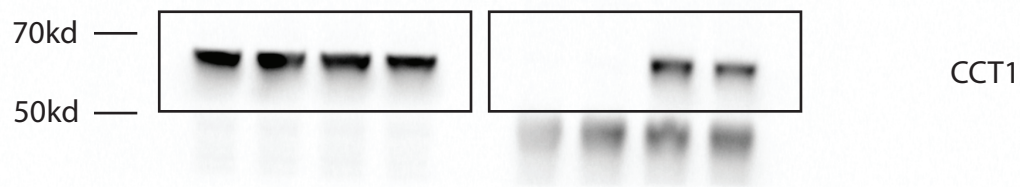

Fig 3F

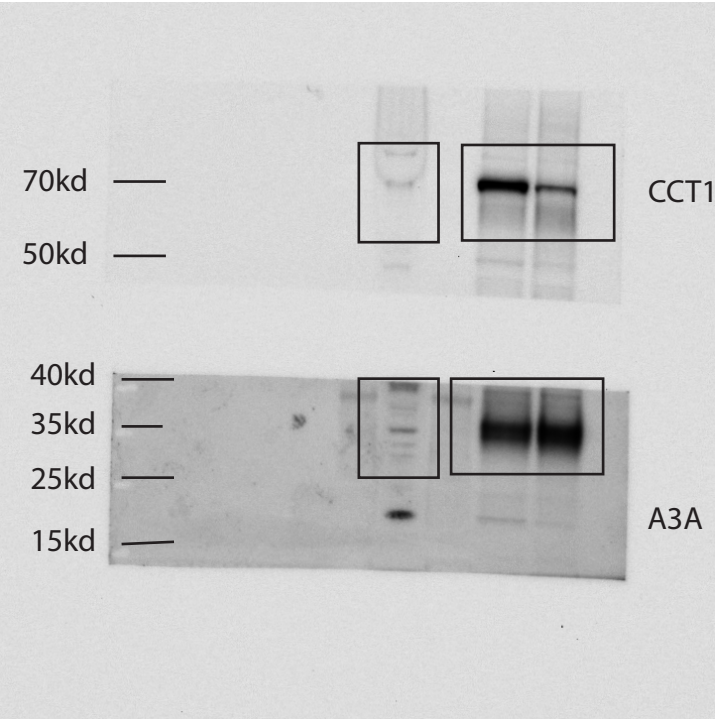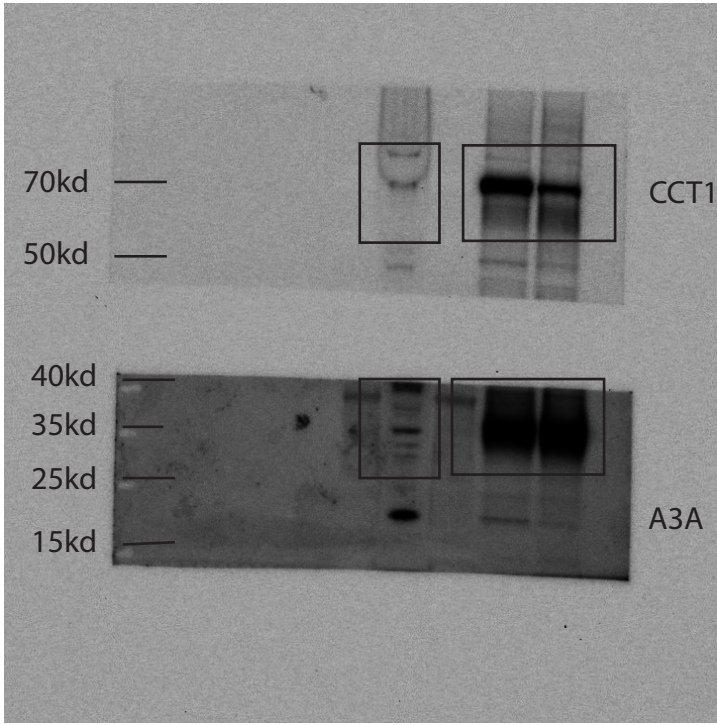

Supplement: EMBR-22-e52145-s006.pdf [file EMBR-22-e52145-s006.pdf]

Fig 1A

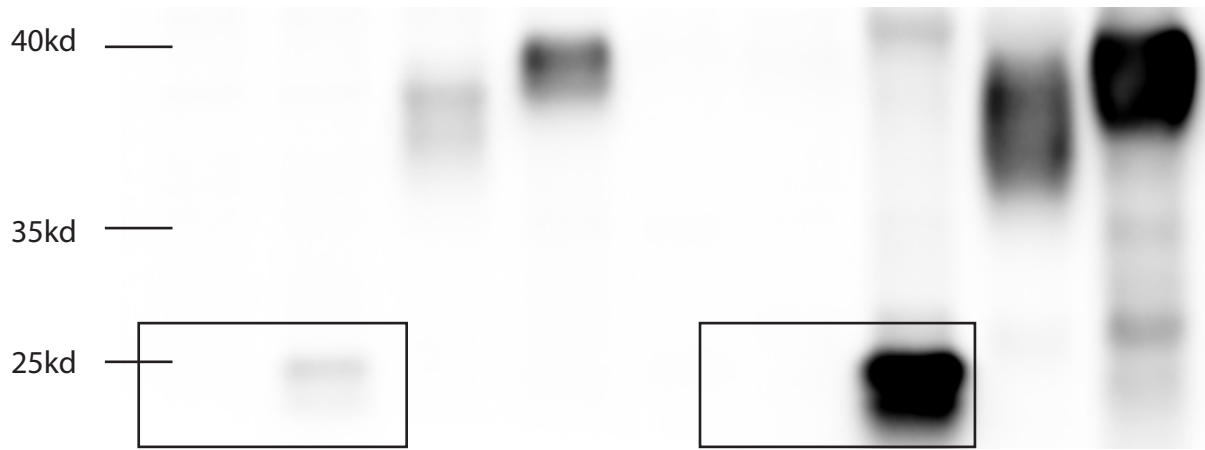

Supplement: EMBR-22-e52145-s007.pdf [file EMBR-22-e52145-s007.pdf]
